# Supplementary material for: Impact of daily avocado consumption on gut microbiota in adults with abdominal obesity: an ancillary study of HAT, a randomized controlled trial
Source: Royal Society of Chemistry journal article supplement (doi:10.1039/d4fo03806a), 2024-12-06
Supplement: d4fo03806a1.pdf [file d4fo03806a1.pdf]

### Supplementary materials

#### 1) Sleep quality and physical activities.

This ancillary study included data collected at baseline and 26 weeks. An in-house health and demographics questionnaire was used to qualitatively measure physical activity (binary response: Yes/No). Sleep health was evaluated using the Pittsburgh Sleep Quality Index (PSQI).<sup>16</sup> A logistic regression test was used to evaluate whether changes in physical activity were associated with avocado intake. Out of 230 participants, 67.5% in the HAB group and 66% in the AVO group reported engaging in regular physical activity at week 0, while 63.2% in the HAB group and 61.3% in the AVO group reported engaging in regular physical activity at week 26. We did not detect significant changes in physical activity associated with avocado intake. Sleep quality index was analyzed using mixed linear model. At week 0, participants in the HAB group had a PSQI score of 1.06 (SD = 0.82), while those in the AVO group had scores of 1.07 (SD = 0.93). At week 26, the PSQI scores were 1.11 (SD = 0.89) for the HAB group and 1.03 (SD = 0.81) for the AVO group. We did not detect significant changes in sleep quality with avocado intake.

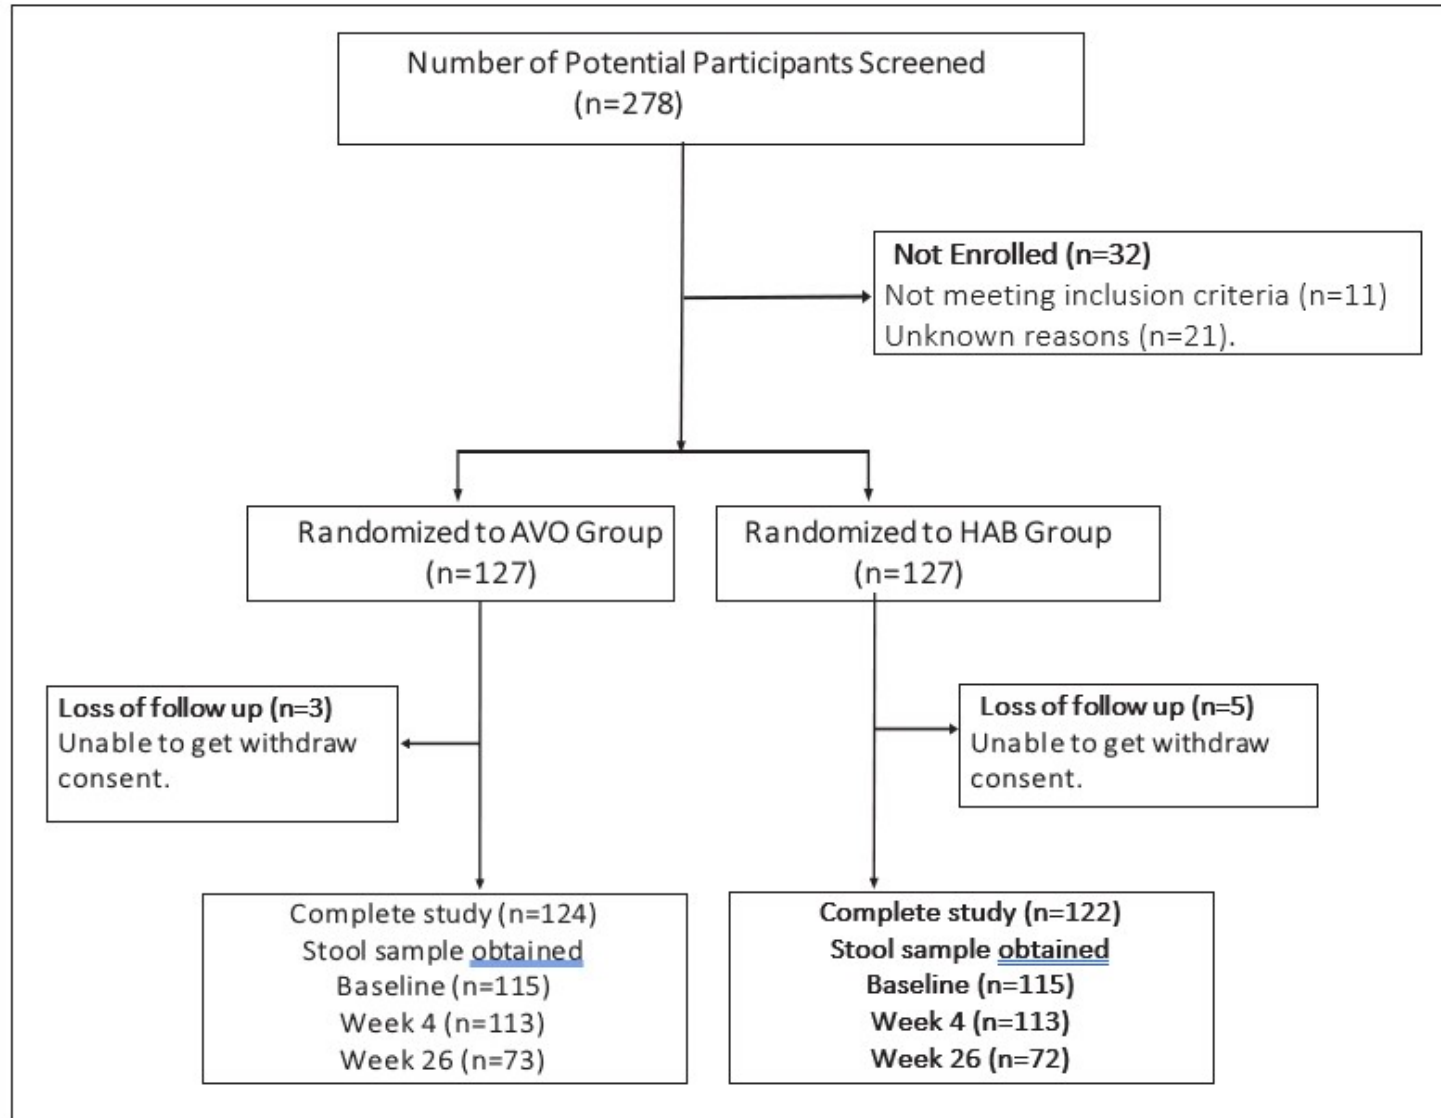

Supplementary Figure 1

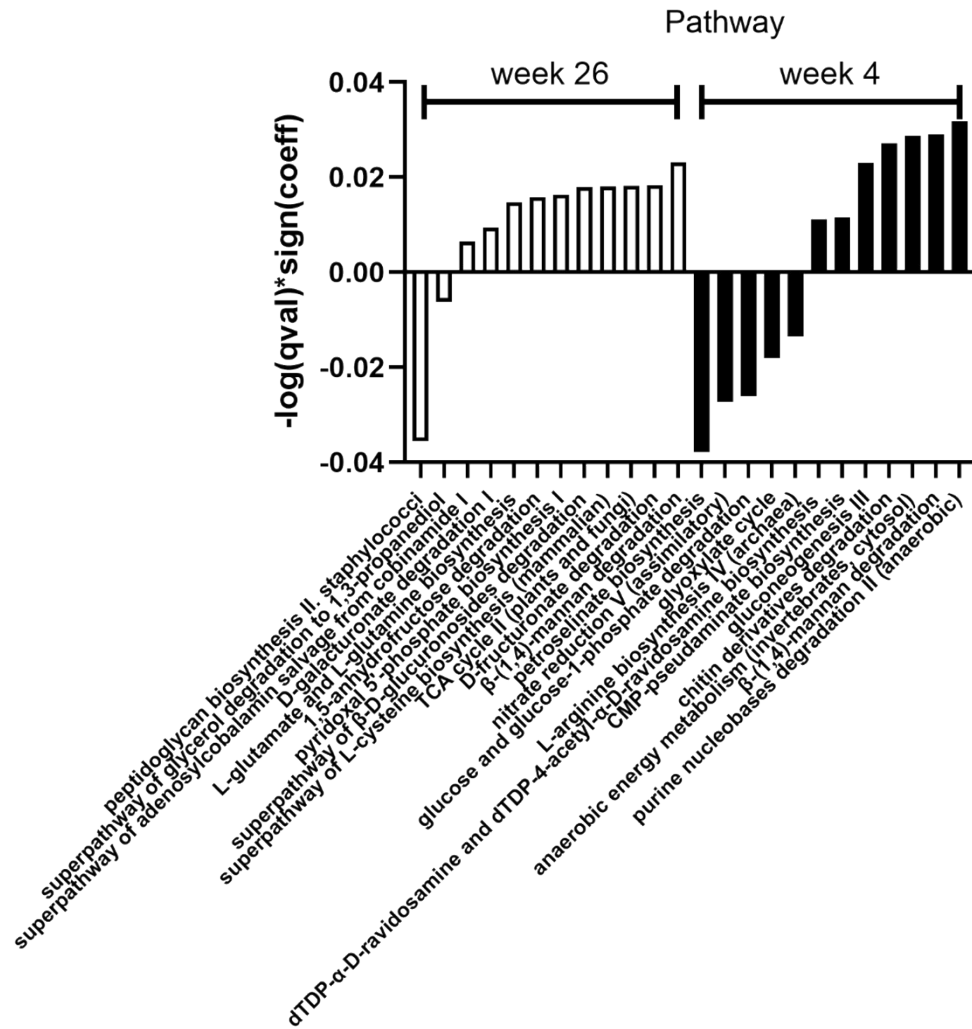

**Supplementary Figure 2:** MaAsLin2 analysis showing the association of metabolic pathways with avocado intake at week 4 and 26 in all participants with  $P < 0.05$ .



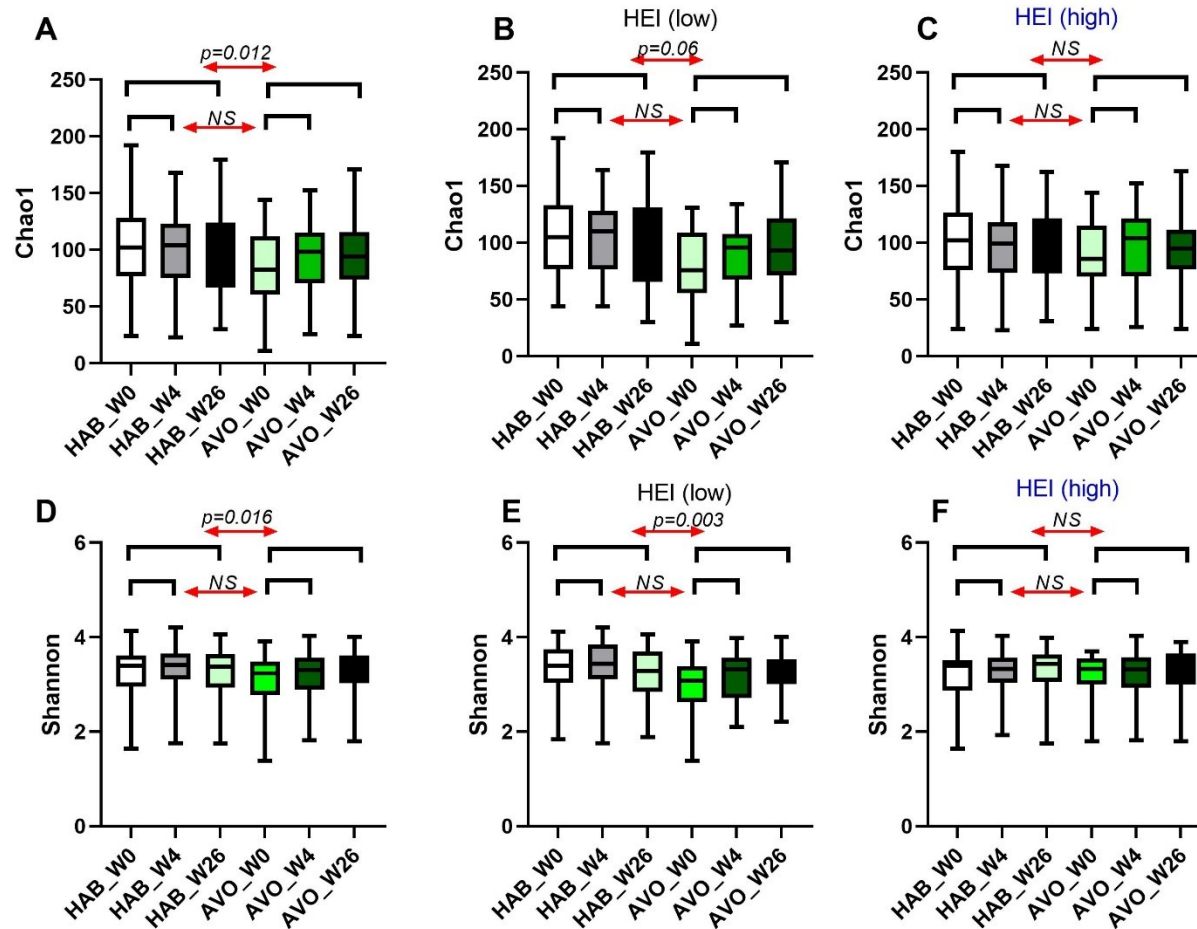

**Supplementary Figure 4:** A linear mixed effects model showed significant increases in alpha diversity indices Chao 1 and Shannon for (A, D) participants who completed baseline, week 4 and week 26 tool sample collections (AVO:  $n=70$ ; HAB:  $n=71$ ). Significant differences were also noted for (B, E) participants with low HEI (AVO:  $n=32$ ; HAB:  $n=33$ ) and (E, F) high HEI (AVO:  $n=37$ ; HAB:  $n=37$ ) in the AVO group after 26 weeks of intervention compared to the HAB group ( $p<0.05$ ). P-values atop each figure indicate significant changes from baseline at week 4 or 26 between AVO and HAB groups.

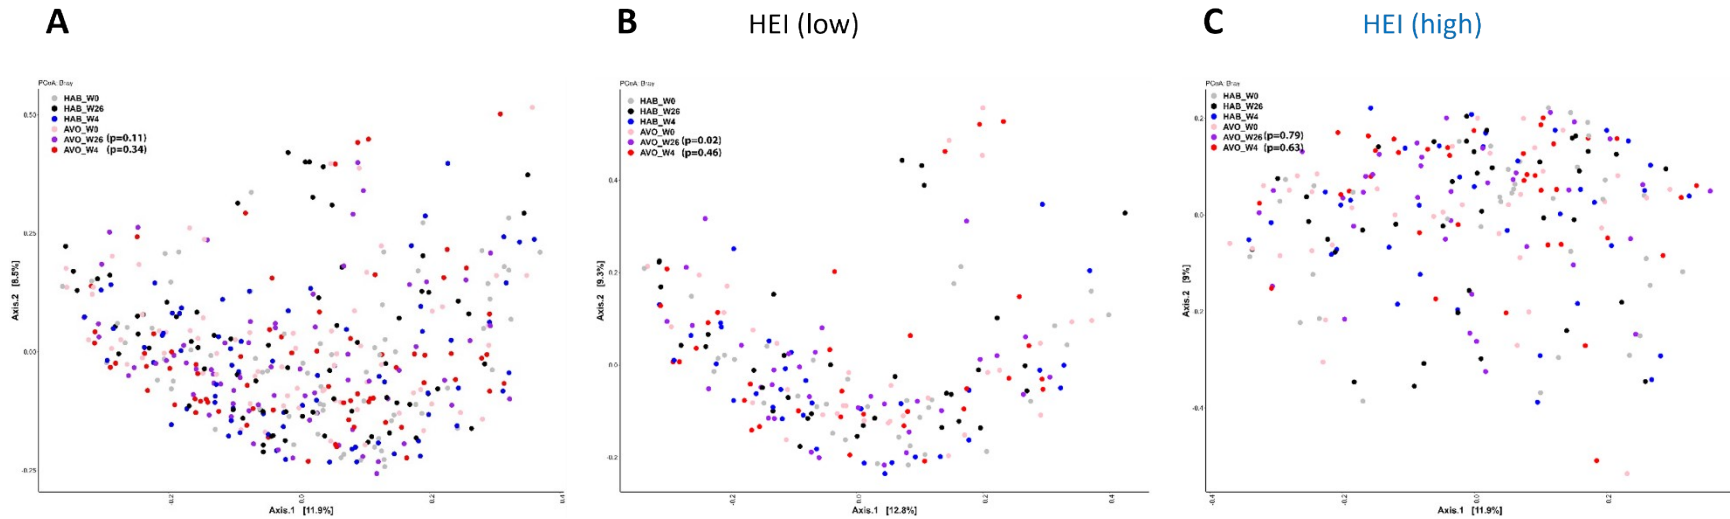

**Supplementary Figure 5:** PCoA plot based on Bray-Curtis dissimilarity, with each point corresponding to a sample and colored-coded for the different group. Analysis was performed in (A) all participants who completed 26 week's intervention (B) Participants with (B) low HEI scores or high HEI scores who completed 26 week's intervention. PERMANOVA showed that the separation of bacterial communities in between baseline and week 26 was significant between AVO and HAB groups in HEI low participants ( $p=0.015$ , Repeated measures PERMANOVA).

**Supplementary table 1: Anthropometric and biochemical measures of HEI\_high participants over time.**

|                             | AVO          |            |               | HAB          |              |               | P wk4 | P wk26 |
|-----------------------------|--------------|------------|---------------|--------------|--------------|---------------|-------|--------|
|                             | Baseline     | Week 4     | Week 26       | Baseline     | Week 4       | Week 26       |       |        |
| N                           | 63           | 63         | 37            | 56           | 56           | 37            |       |        |
| BMI<br>(kg/m <sup>2</sup> ) | 32.93(5.81)  | —          | 33.96(6.13)   | 32.27(5.59)  | —            | 32.57(5.03)   |       | NS     |
| HEI-2015                    | 64.96(8.9)   | —          | 65.99(10.31)  | 67.25(11.01) | —            | 63.88(15.09)  |       | NS     |
| VAT (L)                     | 2.9(1.23)    | —          | 3.02(1.29)    | 2.79(1.27)   | —            | 2.85(1.23)    |       | NS     |
| HFF (%)                     | 0.1(0.12)    | —          | 0.08(0.09)    | 0.1(0.11)    | —            | 0.09(0.12)    |       | NS     |
| DBP<br>(mmHg)               | 77(12)       | 75(9)      | 76(7)         | 78(11)       | 77(8)        | 77(7)         | NS    | NS     |
| SBP<br>(mmHg)               | 121(19)      | 120(16)    | 121(11)       | 122(16)      | 120(13)      | 124(18)       | NS    | NS     |
| Pulse                       | 68.67(8.93)  | 74.1(9.52) | 69.78(8.48)   | 68.8(9.89)   | 74.07(10.01) | 69.86(10.21)  | NS    | NS     |
| Insulin<br>( $\mu$ U/mL)    | 16.9(17.4)   | —          | 14.39(8.72)   | 14.68(9.56)  | —            | 16.15(11.59)  |       | NS     |
| hsCRP<br>(mg/L)             | 6.36(8.85)   | —          | 7.48(8.24)    | 5.24(5.61)   | —            | 6.06(6.23)    |       | NS     |
| Glucose<br>(mg/dL)          | 98.57(32.64) | —          | 101.89(21.72) | 95.91(16.51) | —            | 105.24(26.24) |       | NS     |
| TC<br>(mg/dL)               | 172(35)      | —          | 176(31)       | 191(44)      | —            | 198(44)       |       | NS     |
| Trig<br>(mg/dL)             | 126(101)     | —          | 119(87)       | 121(57)      | —            | 121(58)       |       | NS     |
| HDL-C<br>(mg/dL)            | 53(12)       | —          | 54(10)        | 58(13)       | —            | 55(12)        |       | NS     |
| VLDL-C<br>(mg/dL)           | 25(20)       | —          | 24(17)        | 24(11)       | —            | 24(12)        |       | NS     |
| LDL-C<br>(mg/dL)            | 95(31)       | —          | 100(29)       | 109(35)      | —            | 118(37)       |       | NS     |

Values are presented as mean (SD); P  $\geq$ 0.05, no significance (NS).

**Supplementary table 2:** Significant interactions ( $q < 0.25$ ) between time and intervention at the species level at both week 4 and week 26 in HEI\_low participants

| feature                        | metadata     | coef  | stderr | pval | qval |
|--------------------------------|--------------|-------|--------|------|------|
| Bacterium_AF16_15              | Time_W24_Avo | 1.66  | 0.35   | 0.00 | 0.01 |
| Clostridium_leptum             | Time_W24_Avo | 1.16  | 0.32   | 0.00 | 0.10 |
| Roseburia_hominis              | Time_W24_Avo | 0.61  | 0.17   | 0.00 | 0.10 |
| GGB3653_SGB4964                | Time_W24_Avo | 1.34  | 0.38   | 0.00 | 0.10 |
| Faecalibacterium_SGB15346      | Time_W24_Avo | 1.22  | 0.35   | 0.00 | 0.10 |
| Roseburia_inulinivorans        | Time_W24_Avo | 0.59  | 0.17   | 0.00 | 0.10 |
| Faecalibacterium_prausnitzii   | Time_W24_Avo | 0.50  | 0.15   | 0.00 | 0.10 |
| Roseburia_intestinalis         | Time_W24_Avo | 1.14  | 0.34   | 0.00 | 0.10 |
| Blautia_faecis                 | Time_W24_Avo | 0.81  | 0.25   | 0.00 | 0.13 |
| Neglectibacter_timonensis      | Time_W24_Avo | 0.47  | 0.15   | 0.00 | 0.18 |
| Collinsella_SGB14861           | Time_W24_Avo | 0.36  | 0.12   | 0.00 | 0.18 |
| Alistipes_finegoldii           | Time_W24_Avo | 0.40  | 0.13   | 0.00 | 0.19 |
| GGB45432_SGB63101              | Time_W24_Avo | 0.65  | 0.22   | 0.00 | 0.19 |
| Bacteroides_ovatus             | Time_W24_Avo | 0.83  | 0.28   | 0.00 | 0.19 |
| GGB9522_SGB14921               | Time_W24_Avo | 0.46  | 0.15   | 0.00 | 0.19 |
| GGB51441_SGB71759              | Time_W24_Avo | 0.47  | 0.16   | 0.00 | 0.19 |
| Lachnospiraceae_bacterium      | Time_W24_Avo | 1.03  | 0.36   | 0.00 | 0.20 |
| Dorea_formicigenerans          | Time_W24_Avo | 0.82  | 0.28   | 0.00 | 0.20 |
| GGB9758_SGB15368               | Time_W24_Avo | 0.81  | 0.28   | 0.00 | 0.21 |
| Coprococcus_eutactus           | Time_W24_Avo | 1.09  | 0.39   | 0.01 | 0.21 |
| GGB9501_SGB14898               | Time_W24_Avo | -0.69 | 0.24   | 0.01 | 0.21 |
| GGB9186_SGB14125               | Time_W24_Avo | 0.77  | 0.28   | 0.01 | 0.22 |
| GGB9765_SGB15382               | Time_W24_Avo | 0.70  | 0.25   | 0.01 | 0.22 |
| GGB3588_SGB4808                | Time_W24_Avo | -0.45 | 0.16   | 0.01 | 0.22 |
| Collinsella_intestinalis       | Time_W24_Avo | 0.26  | 0.10   | 0.01 | 0.22 |
| GGB53985_SGB6367               | Time_W24_Avo | 0.20  | 0.07   | 0.01 | 0.22 |
| GGB9787_SGB15410               | Time_W24_Avo | 0.65  | 0.24   | 0.01 | 0.23 |
| GGB35068_SGB47850              | Time_W24_Avo | -0.67 | 0.25   | 0.01 | 0.23 |
| GGB9813_SGB15447               | Time_W24_Avo | 0.72  | 0.27   | 0.01 | 0.23 |
| Streptococcus_australis        | Time_W24_Avo | 0.83  | 0.32   | 0.01 | 0.23 |
| GGB3602_SGB4574                | Time_W24_Avo | 0.27  | 0.10   | 0.01 | 0.23 |
| Amedibacillus_dolichus         | Time_W24_Avo | 0.27  | 0.10   | 0.01 | 0.23 |
| Anaeromassilibacillus_sp_An250 | Time_W4_Avo  | 1.03  | 0.30   | 0.00 | 0.10 |
| Bacteroides_caccae             | Time_W4_Avo  | -0.50 | 0.17   | 0.00 | 0.19 |
| GGB3653_SGB4964                | Time_W4_Avo  | 0.59  | 0.21   | 0.01 | 0.21 |
| Bacteroides_ovatus             | Time_W4_Avo  | 0.39  | 0.14   | 0.01 | 0.21 |
| Eisenbergiella_tayi            | Time_W4_Avo  | 0.83  | 0.30   | 0.01 | 0.22 |
| Hungatella_hathewayi           | Time_W4_Avo  | 0.85  | 0.32   | 0.01 | 0.23 |
| Alistipes_communis             | Time_W4_Avo  | 0.85  | 0.32   | 0.01 | 0.23 |
| Holdemanella_biformis          | Time_W4_Avo  | 0.61  | 0.23   | 0.01 | 0.23 |
| Streptococcus_australis        | Time_W4_Avo  | 0.60  | 0.23   | 0.01 | 0.23 |



**Supplementary table 3: Causal mediation analysis**

| <b>Tests</b>                                                            | <b>Total effect</b> | <b>Mediation proportion</b> |
|-------------------------------------------------------------------------|---------------------|-----------------------------|
| Mediator: Energy intake<br>Outcome: <i>AF16_15</i>                      | 5.08 (0.002)        | 0.02 (0.478)                |
| Mediator: Energy intake<br>Outcome: <i>Faecalibacterium prausnitzii</i> | 2.34 (0.006)        | 0.03 (0.48)                 |
| Mediator: Energy intake<br>Outcome: <i>Chao1</i>                        | 12.51(0.036)        | -0.02 (0.576)               |
| Mediator: Energy intake<br>Outcome: <i>Shannon</i>                      | 0.18 (0.028)        | -0.02 (0.704)               |
| Mediator: Total fruits<br>Outcome: <i>AF16_15</i>                       | 5.11 (0.000)        | 0.02 (0.784)                |
| Mediator: Total fruits<br>Outcome: <i>Faecalibacterium prausnitzii</i>  | 2.38 (0.01)         | 0.01 (0.908)                |
| Mediator: Total fruits<br>Outcome: <i>Chao1</i>                         | 12.79 (0.026)       | 0.14 (0.210)                |
| Mediator: Total fruits<br>Outcome: <i>Shannon</i>                       | 0.18 (0.02)         | 0.07 (0.582)                |
| Mediator: Whole fruits<br>Outcome: <i>AF16_15</i>                       | 5.07 (0.000)        | 0.07 (0.338)                |
| Mediator: Whole fruits<br>Outcome: <i>Faecalibacterium prausnitzii</i>  | 2.38 (0.012)        | 0.02 (0.814)                |
| Mediator: Whole fruits<br>Outcome: <i>Chao1</i>                         | 12.77 (0.014)       | 0.17 (0.168)                |

|                                                                                     |               |                |
|-------------------------------------------------------------------------------------|---------------|----------------|
| Mediator: Whole fruits<br>Outcome: <i>Shannon</i>                                   | 0.18 (0.038)  | 0.06 (0.632)   |
| Mediator: Fatty acids<br>Outcome: <i>AF16_15</i>                                    | 5.09 (0.000)  | 0.05(0.258)    |
| Mediator: Fatty acids<br>Outcome: <i>Faecalibacterium prausnitzii</i>               | 2.35 (0.006)  | -0.01 (0.848)  |
| Mediator: Fatty acids<br>Outcome: <i>Chao1</i>                                      | 12.54 (0.030) | -0.001 (0.986) |
| Mediator: Fatty acids<br>Outcome: <i>Shannon</i>                                    | 0.18 (0.036)  | -0.05 (0.462)  |
| Mediator: HEI2015 total score<br>Outcome: <i>AF16_15</i>                            | 5.07 (0.000)  | 0.02 (0.464)   |
| Mediator: Fatty HEI2015 total score<br>Outcome: <i>Faecalibacterium prausnitzii</i> | 2.31 (0.008)  | 0.07 (0.132)   |
| Mediator: HEI2015 total score<br>Outcome: <i>Chao1</i>                              | 12.95 (0.020) | 0.11 (0.068)   |
| Mediator: HEI2015 total score<br>Outcome: <i>Shannon</i>                            | 0.18 (0.042)  | 0.08 (0.156)   |

Total effect (estimate (p value)) and mediation proportion (MP) (estimate (p value)) are presented.

**Supplementary table 4:** Interactions ( $p < 0.05$ ) between time and intervention at the species level in participants who completed 26 weeks' intervention.

| feature                                  | metadata     | coef  | stderr | pval | qval |
|------------------------------------------|--------------|-------|--------|------|------|
| Firmicutes_bacterium_AF16_15             | Time_W26_Avo | 1.09  | 0.30   | 0.00 | 0.17 |
| Faecalibacterium_prausnitzii             | Time_W26_Avo | 0.66  | 0.20   | 0.00 | 0.44 |
| Clostridium_leptum                       | Time_W26_Avo | 0.90  | 0.29   | 0.00 | 0.62 |
| Roseburia_intestinalis                   | Time_W26_Avo | 0.91  | 0.33   | 0.01 | 0.89 |
| GGB9765_SGB15382                         | Time_W26_Avo | 0.35  | 0.13   | 0.01 | 0.89 |
| Anaeromassilibacillus_sp_An250           | Time_W26_Avo | 0.68  | 0.25   | 0.01 | 0.93 |
| Sanguibacter_SGB15121                    | Time_W26_Avo | 0.38  | 0.15   | 0.01 | 0.97 |
| Eubacterium_SGB6276                      | Time_W26_Avo | 0.63  | 0.24   | 0.01 | 0.97 |
| GGB9186_SGB14125                         | Time_W26_Avo | 0.28  | 0.11   | 0.01 | 0.97 |
| GGB9522_SGB14921                         | Time_W26_Avo | 0.37  | 0.16   | 0.02 | 0.97 |
| Neglectibacter_timonensis                | Time_W26_Avo | 0.42  | 0.18   | 0.02 | 0.97 |
| Roseburia_inulinivorans                  | Time_W26_Avo | 0.86  | 0.37   | 0.02 | 0.97 |
| Hungatella_hathewayi                     | Time_W26_Avo | 0.43  | 0.19   | 0.02 | 0.97 |
| Parasutterella_SGB9260                   | Time_W26_Avo | -0.30 | 0.13   | 0.02 | 0.97 |
| Amedibacillus_dolichus                   | Time_W26_Avo | -0.48 | 0.21   | 0.02 | 0.99 |
| Clostridiales_bacterium_NSJ_40           | Time_W26_Avo | -0.22 | 0.10   | 0.03 | 0.99 |
| GGB3491_SGB4665                          | Time_W26_Avo | 0.15  | 0.07   | 0.03 | 0.99 |
| Erysipelotrichaceae_bacterium_3_1_53     | Time_W26_Avo | 0.25  | 0.11   | 0.03 | 0.99 |
| GGB9760_SGB15373                         | Time_W26_Avo | 0.56  | 0.26   | 0.03 | 0.99 |
| Anaerostipes_hadrus                      | Time_W26_Avo | 0.29  | 0.14   | 0.03 | 0.99 |
| GGB3175_SGB4191                          | Time_W26_Avo | 0.32  | 0.15   | 0.03 | 0.99 |
| Bacteroides_ovatus                       | Time_W26_Avo | 0.68  | 0.32   | 0.03 | 0.99 |
| GGB3653_SGB4964                          | Time_W26_Avo | 0.73  | 0.35   | 0.03 | 0.99 |
| Eubacterium_siraeum                      | Time_W26_Avo | 0.46  | 0.22   | 0.03 | 0.99 |
| Clostridiaceae_bacterium_AF18_31LB       | Time_W26_Avo | 0.43  | 0.20   | 0.04 | 0.99 |
| GGB9559_SGB14969                         | Time_W26_Avo | 0.35  | 0.17   | 0.04 | 0.99 |
| Alistipes_putredinis                     | Time_W26_Avo | 0.61  | 0.29   | 0.04 | 0.99 |
| GGB9719_SGB15273                         | Time_W26_Avo | 0.43  | 0.21   | 0.04 | 0.99 |
| Bacteroides_caccae                       | Time_W26_Avo | 0.62  | 0.31   | 0.05 | 0.99 |
| GGB9758_SGB15368                         | Time_W26_Avo | 0.49  | 0.25   | 0.05 | 0.99 |
| GGB9302_SGB14263                         | Time_W26_Avo | -0.24 | 0.12   | 0.05 | 0.99 |
| GGB51441_SGB71759                        | Time_W26_Avo | 0.38  | 0.19   | 0.05 | 0.99 |
| Mediterraneibacter_SGB48424              | Time_W26_Avo | 0.22  | 0.11   | 0.05 | 0.99 |
| Clostridiaceae_bacterium_Marseille_Q4145 | Time_W4_Avo  | 0.19  | 0.07   | 0.01 | 0.97 |
| Eisenbergiella_tayi                      | Time_W4_Avo  | 0.54  | 0.22   | 0.01 | 0.97 |
| Anaerostipes_caccae                      | Time_W4_Avo  | 0.45  | 0.18   | 0.01 | 0.97 |
| Bacteroides_ovatus                       | Time_W4_Avo  | 0.78  | 0.32   | 0.02 | 0.97 |
| Anaeromassilibacillus_sp_An250           | Time_W4_Avo  | 0.62  | 0.25   | 0.02 | 0.97 |
| Eggerthella_lenta                        | Time_W4_Avo  | 0.69  | 0.30   | 0.02 | 0.97 |
| Acidaminococcus_intestini                | Time_W4_Avo  | -0.35 | 0.16   | 0.02 | 0.99 |
| GGB4596_SGB6358                          | Time_W4_Avo  | -0.21 | 0.10   | 0.03 | 0.99 |
| Catenibacterium_SGB4425                  | Time_W4_Avo  | 0.38  | 0.18   | 0.04 | 0.99 |

|                                            |             |      |      |      |      |
|--------------------------------------------|-------------|------|------|------|------|
| Ruthenibacterium_lactatiformans            | Time_W4_Avo | 0.55 | 0.27 | 0.04 | 0.99 |
| GGB33928_SGB15225                          | Time_W4_Avo | 0.23 | 0.11 | 0.04 | 0.99 |
| Roseburia_faecis                           | Time_W4_Avo | 0.59 | 0.29 | 0.04 | 0.99 |
| Negativibacillus_massiliensis              | Time_W4_Avo | 0.22 | 0.11 | 0.04 | 0.99 |
| Mediterraneibacter_SGB48424                | Time_W4_Avo | 0.23 | 0.11 | 0.04 | 0.99 |
| GGB9719_SGB15273                           | Time_W4_Avo | 0.42 | 0.21 | 0.05 | 0.99 |
| Clostridium_leptum                         | Time_W4_Avo | 0.58 | 0.29 | 0.05 | 0.99 |
| Oscillospiraceae_bacterium_Marseille_Q3528 | Time_W4_Avo | 0.51 | 0.26 | 0.05 | 0.99 |
| Lachnospiraceae_bacterium_NSJ_29           | Time_W4_Avo | 0.54 | 0.27 | 0.05 | 0.99 |

**Supplementary table 5:** Interactions ( $p < 0.05$ ) between time and intervention at the species level in HEI\_low participants who completed 26 weeks' intervention

| feature                        | metadata     | coef  | stderr | pval | qval |
|--------------------------------|--------------|-------|--------|------|------|
| Firmicutes_bacterium_AF16_15   | Time_W26_Avo | 2.10  | 0.47   | 0.00 | 0.02 |
| Clostridium_leptum             | Time_W26_Avo | 1.53  | 0.45   | 0.00 | 0.34 |
| GGB9522_SGB14921               | Time_W26_Avo | 0.53  | 0.16   | 0.00 | 0.34 |
| Blautia_faecis                 | Time_W26_Avo | 0.66  | 0.21   | 0.00 | 0.34 |
| GGB3653_SGB4964                | Time_W26_Avo | 1.19  | 0.37   | 0.00 | 0.34 |
| GGB9813_SGB15447               | Time_W26_Avo | 0.23  | 0.07   | 0.00 | 0.34 |
| GGB53985_SGB6367               | Time_W26_Avo | 0.36  | 0.12   | 0.00 | 0.34 |
| Neglectibacter_timonensis      | Time_W26_Avo | 0.68  | 0.22   | 0.00 | 0.34 |
| Collinsella_SGB14861           | Time_W26_Avo | 1.13  | 0.37   | 0.00 | 0.34 |
| Faecalibacterium_SGB15346      | Time_W26_Avo | 0.99  | 0.34   | 0.00 | 0.40 |
| GGB4578_SGB6328                | Time_W26_Avo | 0.41  | 0.14   | 0.00 | 0.40 |
| GGB33469_SGB15236              | Time_W26_Avo | 0.57  | 0.20   | 0.01 | 0.40 |
| Lachnospiraceae_bacterium      | Time_W26_Avo | 0.75  | 0.26   | 0.01 | 0.40 |
| GGB3588_SGB4808                | Time_W26_Avo | 0.47  | 0.17   | 0.01 | 0.41 |
| Collinsella_intestinalis       | Time_W26_Avo | 0.39  | 0.14   | 0.01 | 0.41 |
| Bacteroides_ovatus             | Time_W26_Avo | 1.15  | 0.43   | 0.01 | 0.44 |
| Streptococcus_australis        | Time_W26_Avo | -0.45 | 0.17   | 0.01 | 0.44 |
| Faecalibacterium_prausnitzii   | Time_W26_Avo | 0.89  | 0.33   | 0.01 | 0.44 |
| Roseburia_intestinalis         | Time_W26_Avo | 1.25  | 0.48   | 0.01 | 0.47 |
| GGB9501_SGB14898               | Time_W26_Avo | 0.44  | 0.17   | 0.01 | 0.49 |
| GGB9707_SGB15229               | Time_W26_Avo | 0.57  | 0.22   | 0.01 | 0.49 |
| Alistipes_finegoldii           | Time_W26_Avo | 0.89  | 0.35   | 0.01 | 0.49 |
| Dorea_formicigenerans          | Time_W26_Avo | 0.67  | 0.26   | 0.01 | 0.49 |
| Roseburia_hominis              | Time_W26_Avo | 0.90  | 0.36   | 0.01 | 0.49 |
| GGB9765_SGB15382               | Time_W26_Avo | 0.52  | 0.21   | 0.01 | 0.49 |
| GGB9787_SGB15410               | Time_W26_Avo | 0.33  | 0.13   | 0.01 | 0.50 |
| GGB45432_SGB63101              | Time_W26_Avo | 0.68  | 0.28   | 0.02 | 0.50 |
| Parabacteroides_merdae         | Time_W26_Avo | 0.81  | 0.33   | 0.02 | 0.50 |
| Bacteroides_intestinalis       | Time_W26_Avo | 0.60  | 0.25   | 0.02 | 0.59 |
| GGB51441_SGB71759              | Time_W26_Avo | 0.70  | 0.30   | 0.02 | 0.60 |
| GGB9559_SGB14969               | Time_W26_Avo | 0.54  | 0.23   | 0.02 | 0.60 |
| Coprococcus_eutactus           | Time_W26_Avo | 0.55  | 0.24   | 0.02 | 0.60 |
| Solibaculum_mannosilyticum     | Time_W26_Avo | 0.43  | 0.19   | 0.02 | 0.62 |
| Anaeromassilibacillus_sp_An250 | Time_W26_Avo | 0.85  | 0.37   | 0.03 | 0.64 |
| Alistipes_putredinis           | Time_W26_Avo | 1.01  | 0.45   | 0.03 | 0.64 |
| Amedibacillus_dolichus         | Time_W26_Avo | -0.74 | 0.33   | 0.03 | 0.66 |
| Blautia_sp_MSK_20_85           | Time_W26_Avo | 0.81  | 0.37   | 0.03 | 0.66 |
| GGB9758_SGB15368               | Time_W26_Avo | 0.81  | 0.37   | 0.03 | 0.66 |
| GGB9186_SGB14125               | Time_W26_Avo | 0.23  | 0.11   | 0.03 | 0.66 |
| GGB3277_SGB4327                | Time_W26_Avo | 0.85  | 0.39   | 0.03 | 0.66 |
| Roseburia_inulinivorans        | Time_W26_Avo | 1.04  | 0.48   | 0.03 | 0.66 |
| Ruminococcus_gnavus            | Time_W26_Avo | -0.95 | 0.45   | 0.04 | 0.66 |

|                                            |              |       |      |      |      |
|--------------------------------------------|--------------|-------|------|------|------|
| Lachnospiraceae_bacterium_AM48_27BH        | Time_W26_Avo | 0.15  | 0.07 | 0.04 | 0.66 |
| Blautia_producta                           | Time_W26_Avo | -0.71 | 0.33 | 0.04 | 0.66 |
| Eubacterium_siraeum                        | Time_W26_Avo | 0.60  | 0.28 | 0.04 | 0.66 |
| GGB80140_SGB15224                          | Time_W26_Avo | 0.31  | 0.14 | 0.04 | 0.66 |
| Oscillospiraceae_bacterium_Marseille_Q3528 | Time_W26_Avo | 0.56  | 0.27 | 0.04 | 0.66 |
| Coprococcus_SGB4669                        | Time_W26_Avo | 0.41  | 0.20 | 0.04 | 0.70 |
| GGB4684_SGB6478                            | Time_W26_Avo | 0.29  | 0.14 | 0.04 | 0.70 |
| Clostridium_butyricum                      | Time_W26_Avo | -0.73 | 0.36 | 0.05 | 0.70 |
| Oscillibacter_sp_ER4                       | Time_W26_Avo | 0.80  | 0.40 | 0.05 | 0.70 |
| GGB9641_SGB15117                           | Time_W26_Avo | 0.41  | 0.21 | 0.05 | 0.70 |
| Erysipelotrichaceae_bacterium_3_1_53       | Time_W26_Avo | 0.35  | 0.17 | 0.05 | 0.70 |
| Lawsonibacter_asaccharolyticus             | Time_W26_Avo | 0.61  | 0.31 | 0.05 | 0.70 |
| GGB51647_SGB4348                           | Time_W26_Avo | -0.26 | 0.13 | 0.05 | 0.70 |
| Gemella_sanguinis                          | Time_W26_Avo | -0.18 | 0.09 | 0.05 | 0.70 |
| Bacteroides_fragilis                       | Time_W26_Avo | 0.56  | 0.28 | 0.05 | 0.70 |
| Roseburia_sp_BX1005                        | Time_W26_Avo | 0.39  | 0.19 | 0.05 | 0.70 |
| Streptococcus_australis                    | Time_W4_Avo  | -0.46 | 0.17 | 0.01 | 0.41 |
| Anaeromassilibacillus_sp_An250             | Time_W4_Avo  | 1.02  | 0.37 | 0.01 | 0.41 |
| Bacteroides_ovatus                         | Time_W4_Avo  | 1.04  | 0.43 | 0.02 | 0.50 |
| GGB2998_SGB3988                            | Time_W4_Avo  | 0.30  | 0.13 | 0.02 | 0.58 |
| GGB9635_SGB15106                           | Time_W4_Avo  | 0.48  | 0.21 | 0.02 | 0.63 |
| GGB9512_SGB14909                           | Time_W4_Avo  | 0.53  | 0.24 | 0.03 | 0.64 |
| Bacteroides_caccae                         | Time_W4_Avo  | 0.84  | 0.39 | 0.03 | 0.66 |
| Cuneatibacter_caecimuris                   | Time_W4_Avo  | 0.24  | 0.11 | 0.03 | 0.66 |
| Holdemanella_biformis                      | Time_W4_Avo  | 0.34  | 0.16 | 0.04 | 0.66 |
| Lactonifactor_sp_BIOML_A6                  | Time_W4_Avo  | 0.45  | 0.22 | 0.05 | 0.70 |
| Oscillospiraceae_bacterium_Marseille_Q3528 | Time_W4_Avo  | 0.53  | 0.27 | 0.05 | 0.70 |
| Coprobacillus_cateniformis                 | Time_W4_Avo  | 0.34  | 0.17 | 0.05 | 0.70 |
